# Supplementary material for: A yeast fermentate improves gastrointestinal discomfort and constipation by modulation of the gut microbiome: results from a randomized double-blind placebo-controlled pilot trial
Source: PubMed Central journal article supplement (PMC5584023; doi:10.1186/s12906-017-1948-0), 2017-09-04
Supplement: 12906_2017_1948_MOESM7_ESM.pdf [file 12906_2017_1948_MOESM7_ESM.pdf]

Additional file 8 Microbial taxa fold-changes (V2/V1 and V3/V1) in the severe subgroup.

| Taxa                         |                                  | Severe subgroup (n=54) |              |       |              |               |              |       |              |
|------------------------------|----------------------------------|------------------------|--------------|-------|--------------|---------------|--------------|-------|--------------|
|                              |                                  | Placebo (n=27)         |              |       |              | EpiCor (n=27) |              |       |              |
|                              |                                  | V2/V1                  |              | V3/V1 |              | V2/V1         |              | V3/V1 |              |
|                              |                                  | FC                     | p-val.       | FC    | p-val.       | FC            | p-val.       | FC    | p-val.       |
| <b>Phylum Actinobacteria</b> |                                  |                        |              |       |              |               |              |       |              |
| <b>Bifidobacteriaceae</b>    | -                                | 0.72                   | 0.162        | 1.05  | 0.927        | 1.04          | 0.956        | 1.07  | 0.879        |
|                              | <i>Bifidobacterium</i>           | 0.72                   | <b>0.032</b> | 1.05  | 0.859        | 1.04          | 0.911        | 1.07  | 0.766        |
| <b>Coriobacteriaceae</b>     | -                                | 1.06                   | 0.928        | 1.07  | 0.904        | 1.21          | 0.637        | 0.96  | 0.981        |
|                              | <i>Asaccharobacter</i>           | 1.41                   | 0.982        | 1.42  | 0.982        | 1.40          | 0.967        | 1.34  | 0.976        |
|                              | <i>Collinsella</i>               | 1.29                   | 0.383        | 1.30  | 0.351        | 0.82          | 0.847        | 0.66  | 0.560        |
|                              | Coriobacteriaceae_uncl.          | 0.61                   | 0.620        | 0.73  | 0.789        | 1.84          | 0.383        | 1.43  | 0.769        |
|                              | <i>Eggerthella</i>               | 2.60                   | 1.000        | 1.87  | 1.000        | 1.00          | 1.000        | 0.00  | 1.000        |
|                              | <i>Enterorhabdus</i>             | 1.33                   | 0.993        | 0.64  | 0.991        | 0.51          | 0.953        | 0.63  | 0.973        |
|                              | <i>Slackia</i>                   | 0.95                   | 1.000        | 0.38  | 0.964        | 3.20          | 0.854        | 0.80  | 0.999        |
| <b>Propionibacteriaceae</b>  | -                                | 0.07                   | 0.991        | 0.01  | 1.000        | 2.11          | 0.997        | 1.56  | 0.999        |
|                              | <i>Propionibacterium</i>         | 0.07                   | 0.983        | 0.01  | 0.999        | 2.11          | 0.993        | 1.56  | 0.998        |
| <b>Phylum Bacteroidetes</b>  |                                  |                        |              |       |              |               |              |       |              |
| <b>Bacteroidaceae</b>        | -                                | 0.84                   | <b>0.054</b> | 0.89  | 0.216        | 1.15          | 0.118        | 1.14  | 0.161        |
|                              | <i>Bacteroides</i>               | 0.84                   | <b>0.004</b> | 0.89  | <b>0.054</b> | 1.15          | <b>0.015</b> | 1.14  | <b>0.027</b> |
| <b>Bacteroidetes_uncl.</b>   | -                                | 1.31                   | 0.949        | 0.86  | 0.989        | 0.96          | 0.999        | 0.89  | 0.989        |
| <b>Bacteroidales_uncl.</b>   | -                                | 1.21                   | 0.992        | 0.67  | 0.981        | 1.20          | 0.997        | 1.93  | 0.943        |
| <b>Porphyromonadaceae</b>    | -                                | 0.86                   | 0.549        | 1.03  | 0.979        | 1.13          | 0.513        | 0.96  | 0.926        |
|                              | <i>Barnesiella</i>               | 0.83                   | 0.883        | 0.84  | 0.892        | 1.39          | 0.227        | 1.31  | 0.371        |
|                              | <i>Butyricimonas</i>             | 1.82                   | 0.979        | 1.63  | 0.988        | 0.80          | 0.987        | 0.77  | 0.984        |
|                              | <i>Odoribacter</i>               | 0.65                   | 0.969        | 1.27  | 0.982        | 1.59          | 0.980        | 1.68  | 0.973        |
|                              | Porphyromonadaceae_uncl.         | 0.93                   | 0.973        | 1.17  | 0.836        | 1.07          | 0.944        | 0.85  | 0.779        |
|                              | <i>Parabacteroides</i>           | 0.93                   | 0.969        | 0.98  | 0.998        | 0.84          | 0.893        | 0.54  | 0.415        |
| <b>Prevotellaceae</b>        | -                                | 0.77                   | 0.539        | 1.03  | 0.987        | 1.43          | 0.138        | 1.01  | 0.999        |
|                              | <i>Alloprevotella</i>            | 1.33                   | 0.987        | 2.11  | 0.860        | 0.71          | 0.991        | 0.79  | 0.996        |
|                              | <i>Hallella</i>                  | 1.00                   | 1.000        | 1.00  | 1.000        | 0.00          | 0.924        | 0.00  | 0.924        |
|                              | <i>Paraprevotella</i>            | 0.02                   | 0.624        | 0.01  | 0.619        | 1.71          | 0.681        | 0.14  | 0.575        |
|                              | <i>Prevotella</i>                | 0.80                   | 0.603        | 1.11  | 0.856        | 1.68          | <b>0.039</b> | 1.35  | 0.389        |
|                              | Prevotellaceae_uncl.             | 1.41                   | 0.971        | 1.21  | 0.992        | 0.94          | 0.998        | 1.19  | 0.982        |
| <b>Rikenellaceae</b>         | -                                | 1.15                   | 0.524        | 0.74  | 0.154        | 0.55          | <b>0.035</b> | 0.64  | 0.113        |
|                              | <i>Alistipes</i>                 | 1.15                   | 0.288        | 0.74  | <b>0.029</b> | 0.55          | <b>0.001</b> | 0.64  | <b>0.013</b> |
| <b>Phylum Firmicutes</b>     |                                  |                        |              |       |              |               |              |       |              |
| <b>Acidaminococcaceae</b>    | -                                | 1.51                   | <b>0.099</b> | 1.70  | <b>0.017</b> | 1.06          | 0.975        | 1.07  | 0.965        |
|                              | <i>Acidaminococcus</i>           | 14.95                  | 0.174        | 18.50 | <b>0.070</b> | 0.00          | 1.000        | 0.00  | 1.000        |
|                              | Acidaminococcaceae_uncl.         | 1.15                   | 0.999        | 1.85  | 0.953        | 1.53          | 0.977        | 1.45  | 0.984        |
|                              | <i>Succinoclasticum</i>          | 1.62                   | 0.614        | 1.46  | 0.760        | 3.09          | 0.646        | 0.90  | 0.999        |
|                              | <i>Phascolarctobacterium</i>     | 1.06                   | 0.972        | 1.21  | 0.669        | 0.83          | 0.712        | 1.05  | 0.969        |
| <b>Clostridiales_uncl.</b>   | -                                | 0.82                   | 0.564        | 1.04  | 0.969        | 1.16          | 0.594        | 1.19  | 0.488        |
| <b>Clostridiaceae</b>        | -                                | 0.75                   | 0.956        | 0.66  | 0.918        | 0.92          | 0.999        | 0.84  | 0.996        |
|                              | <i>Clostridium_sensu_stricto</i> | 0.75                   | 0.914        | 0.66  | 0.843        | 0.92          | 0.998        | 0.84  | 0.992        |
| <b>Enterococcaceae</b>       | -                                | 1.02                   | 1.000        | 1.28  | 0.999        | 0.81          | 1.000        | 0.59  | 1.000        |
|                              | <i>Enterococcus</i>              | 1.02                   | 1.000        | 1.28  | 0.999        | 0.81          | 1.000        | 0.59  | 1.000        |
| <b>Erysipelotrichaceae</b>   | -                                | 1.41                   | 0.910        | 1.12  | 0.991        | 1.61          | 0.895        | 2.13  | 0.686        |
|                              | <i>Catenibacterium</i>           | 1.16                   | 0.999        | 1.17  | 0.999        | 0.27          | 0.999        | 0.27  | 0.999        |
|                              | <i>Clostridium_XVIII</i>         | 4.08                   | 0.932        | 1.79  | 0.995        | 3.16          | 0.660        | 2.95  | 0.712        |
|                              | <i>Coprobacillus</i>             | 1.45                   | 1.000        | 1.66  | 0.999        | 0.40          | 0.999        | 0.74  | 1.000        |
|                              | Erysipelotrichaceae_uncl.        | 1.17                   | 0.985        | 1.01  | 1.000        | 0.75          | 0.993        | 0.96  | 1.000        |
|                              | <i>Turicibacter</i>              | 1.00                   | 1.000        | 1.29  | 1.000        | 0.70          | 1.000        | 8.85  | 0.870        |
| <b>Firmicutes_uncl.</b>      | -                                | 1.04                   | 0.936        | 1.15  | 0.386        | 0.82          | 0.227        | 0.59  | <b>0.002</b> |
| <b>Lachnospiraceae</b>       | -                                | 1.09                   | <b>0.000</b> | 0.98  | 0.593        | 1.03          | 0.294        | 1.09  | <b>0.001</b> |
|                              | <i>Anaerostipes</i>              | 0.89                   | 0.901        | 0.63  | 0.318        | 2.81          | <b>0.001</b> | 2.69  | <b>0.003</b> |
|                              | <i>Blautia</i>                   | 1.86                   | <b>0.000</b> | 1.36  | <b>0.000</b> | 1.00          | 0.999        | 1.05  | 0.585        |

|                               |                               |      |              |      |              |      |              |      |              |
|-------------------------------|-------------------------------|------|--------------|------|--------------|------|--------------|------|--------------|
|                               | <i>Clostridium_XIVa_uncl.</i> | 0.92 | 0.991        | 1.08 | 0.991        | 1.10 | 0.959        | 0.99 | 1.000        |
|                               | <i>Clostridium_XIVb_uncl.</i> | 0.98 | 1.000        | 0.83 | 0.998        | 1.06 | 1.000        | 0.62 | 0.988        |
|                               | <i>Coprococcus</i>            | 0.86 | 0.505        | 0.78 | 0.195        | 0.78 | 0.257        | 0.71 | 0.104        |
|                               | <i>Dorea</i>                  | 1.03 | 0.979        | 0.95 | 0.952        | 1.08 | 0.935        | 0.75 | 0.510        |
|                               | <i>Lachnospira</i>            | 0.62 | 0.968        | 2.29 | 0.691        | 0.29 | 0.653        | 1.10 | 0.990        |
|                               | Lachnospiraceae_uncl.         | 0.91 | 0.296        | 0.89 | 0.189        | 0.86 | 0.152        | 1.07 | 0.581        |
|                               | <i>Howardella</i>             | 1.04 | 1.000        | 1.98 | 0.986        | 0.40 | 0.998        | 0.52 | 0.999        |
|                               | <i>Roseburia</i>              | 0.92 | 0.432        | 0.75 | <b>0.002</b> | 1.15 | 0.197        | 1.21 | <b>0.043</b> |
|                               | <i>Ruminococcus</i>           | 1.13 | 0.942        | 1.97 | <b>0.070</b> | 1.21 | 0.802        | 1.41 | 0.439        |
| Lactobacillaceae              | -                             | 1.29 | 0.994        | 0.17 | 0.950        | 0.84 | 1.000        | 1.04 | 1.000        |
|                               | <i>Lactobacillus</i>          | 1.29 | 0.987        | 0.17 | 0.902        | 0.84 | 1.000        | 1.04 | 1.000        |
| Peptostreptococcaceae         | -                             | 1.01 | 1.000        | 1.22 | 0.855        | 0.60 | 0.679        | 0.79 | 0.894        |
|                               | <i>Clostridium_XI</i>         | 1.01 | 1.000        | 1.22 | 0.733        | 0.60 | 0.456        | 0.79 | 0.793        |
| Ruminococcaceae               | -                             | 0.90 | <b>0.000</b> | 0.92 | <b>0.004</b> | 0.93 | <b>0.031</b> | 0.89 | <b>0.000</b> |
|                               | <i>Butyricoccus</i>           | 0.66 | 0.819        | 0.67 | 0.820        | 1.12 | 0.994        | 0.78 | 0.980        |
|                               | <i>Faecalibacterium</i>       | 0.64 | <b>0.000</b> | 0.70 | <b>0.001</b> | 0.87 | <b>0.086</b> | 0.77 | <b>0.001</b> |
|                               | <i>Flavonifractor</i>         | 1.74 | 0.930        | 1.49 | 0.969        | 1.38 | 0.984        | 1.28 | 0.991        |
|                               | <i>Gemmiger</i>               | 0.82 | 0.727        | 0.67 | 0.358        | 0.72 | 0.640        | 0.95 | 0.985        |
|                               | <i>Clostridium_IV_uncl.</i>   | 0.40 | 0.809        | 0.89 | 0.993        | 0.35 | 0.958        | 0.36 | 0.959        |
|                               | <i>Oscillibacter</i>          | 0.53 | 0.834        | 0.86 | 0.984        | 1.87 | 0.844        | 2.53 | 0.606        |
|                               | Ruminococcaceae_uncl.         | 0.98 | 0.760        | 1.04 | 0.445        | 0.92 | 0.177        | 0.92 | 0.182        |
|                               | <i>Ruminococcus</i>           | 1.13 | 0.618        | 0.95 | 0.935        | 1.15 | 0.626        | 0.89 | 0.782        |
| Streptococcaceae              | -                             | 0.98 | 1.000        | 1.10 | 0.996        | 0.70 | 0.943        | 0.98 | 1.000        |
|                               | <i>Lactococcus</i>            | 0.78 | 0.996        | 1.10 | 0.999        | 0.44 | 0.999        | 1.24 | 1.000        |
|                               | <i>Streptococcus</i>          | 1.07 | 0.998        | 1.10 | 0.997        | 0.71 | 0.902        | 0.96 | 0.998        |
| Veillonellaceae               | -                             | 1.82 | <b>0.014</b> | 1.48 | 0.202        | 0.95 | 0.980        | 1.34 | 0.371        |
|                               | <i>Dialister</i>              | 1.98 | <b>0.000</b> | 1.50 | <b>0.085</b> | 1.00 | 1.000        | 1.43 | 0.103        |
|                               | <i>Megamonas</i>              | 3.26 | 0.996        | 2.12 | 0.999        | 2.40 | 0.999        | 0.81 | 1.000        |
|                               | <i>Megasphaera</i>            | 0.74 | 0.990        | 1.19 | 0.995        | 0.53 | 0.942        | 0.77 | 0.986        |
|                               | <i>Mitsuokella</i>            | 0.40 | 0.999        | 1.03 | 1.000        | 1.49 | 1.000        | 1.34 | 1.000        |
|                               | <i>Veillonella</i>            | 0.87 | 1.000        | 2.05 | 0.990        | 0.40 | 1.000        | 0.62 | 1.000        |
| <b>Phylum Proteobacteria</b>  |                               |      |              |      |              |      |              |      |              |
| Alphaproteobacteria_uncl.     | -                             | 1.00 | 1.000        | 1.00 | 1.000        | 0.71 | 0.997        | 1.93 | 0.967        |
| Desulfovibrionaceae           | -                             | 1.88 | 0.993        | 4.18 | 0.915        | 0.80 | 0.996        | 1.01 | 1.000        |
|                               | <i>Desulfovibrio</i>          | 2.88 | 0.989        | 7.83 | 0.860        | 1.28 | 1.000        | 2.02 | 0.999        |
|                               | Desulfovibrionaceae_uncl.     | 1.12 | 1.000        | 1.41 | 0.999        | 0.77 | 0.990        | 0.94 | 0.999        |
| Enterobacteriaceae            | -                             | 0.50 | 0.911        | 1.23 | 0.981        | 0.66 | 0.838        | 0.77 | 0.926        |
|                               | <i>Escherichia/Shigella</i>   | 0.46 | 0.871        | 1.33 | 0.947        | 0.63 | 0.772        | 0.83 | 0.945        |
|                               | <i>Klebsiella</i>             | 0.64 | 0.997        | 0.77 | 0.999        | 0.75 | 0.991        | 0.59 | 0.974        |
| Sutterellaceae                | -                             | 0.94 | 1.000        | 1.44 | 0.999        | 1.26 | 0.998        | 0.95 | 1.000        |
|                               | <i>Parasutterella</i>         | 1.07 | 1.000        | 0.65 | 1.000        | 1.10 | 1.000        | 0.62 | 0.998        |
|                               | <i>Sutterella</i>             | 0.86 | 1.000        | 1.72 | 0.997        | 1.44 | 0.997        | 1.27 | 0.999        |
| Oxalobacteraceae              | -                             | 1.00 | 1.000        | 1.00 | 1.000        | 0.00 | 0.997        | 0.00 | 0.997        |
|                               | Oxalobacteraceae_uncl.        | 1.00 | 1.000        | 1.00 | 1.000        | 0.00 | 0.994        | 0.00 | 0.994        |
| Pasteurellaceae               | -                             | 0.70 | 1.000        | 0.19 | 1.000        | 1.76 | 0.998        | 1.20 | 1.000        |
|                               | <i>Haemophilus</i>            | 0.70 | 1.000        | 0.19 | 1.000        | 1.76 | 0.996        | 1.20 | 1.000        |
| <b>Phylum Spirochaetae</b>    |                               |      |              |      |              |      |              |      |              |
| Brachyspiraceae               | -                             | 1.00 | 1.000        | 1.56 | 0.997        | 1.01 | 1.000        | 0.76 | 0.999        |
|                               | <i>Brachyspira</i>            | 1.00 | 1.000        | 1.56 | 0.994        | 1.01 | 1.000        | 0.76 | 0.999        |
| Spirochaetaceae               | -                             | 1.83 | 1.000        | 1.48 | 1.000        | 1.78 | 1.000        | 0.78 | 1.000        |
|                               | <i>Treponema</i>              | 1.83 | 0.999        | 1.48 | 1.000        | 1.78 | 1.000        | 0.78 | 1.000        |
| <b>Phylum Verrucomicrobia</b> |                               |      |              |      |              |      |              |      |              |
| Verrucomicrobiaceae           | <i>Akkermansia</i>            | 1.22 | 0.707        | 1.23 | 0.680        | 0.77 | 0.825        | 0.84 | 0.908        |

**Legend:** A two-way repeated measures ANOVA with Dunnett's multiple comparison's test against V1 was performed to test for significant changes over time within each group ( $p$ -values  $\leq 0.05$  and  $< 0.1$  are depicted in bold text). FC, fold-change; V, visit.
