# Supplementary material for: A yeast fermentate improves gastrointestinal discomfort and constipation by modulation of the gut microbiome: results from a randomized double-blind placebo-controlled pilot trial
Source: Springer Nature journal article supplement (doi:10.1186/s12906-017-1948-0), 2017-09-04
Supplement: MOESM1 [file 14976506]

Additional file 2 Mean values and standard error or the mean (SEM) calculated for the daily records on GI symptoms (averages were calculated for 2-week intervals).

| GI symptoms |                         | Total cohort      |                   | Severe       |                   | Moderate     |              |
|-------------|-------------------------|-------------------|-------------------|--------------|-------------------|--------------|--------------|
|             |                         | EpiCor            | Placebo           | EpiCor       | Placebo           | EpiCor       | Placebo      |
| BD_T1       | Mean                    | 1.72              | 1.51              | 2.05         | 1.91              | 0.95         | 0.69         |
|             | SEM                     | ±0.14             | ±0.13             | ±0.16        | ±0.13             | ±0.14        | ±0.09        |
| BD_T2       | Mean                    | 1.30              | 1.24              | 1.60         | 1.46              | 0.61         | 0.79         |
|             | SEM                     | ±0.14             | ±0.14             | ±0.17        | ±0.18             | ±0.11        | ±0.15        |
| BD_T3       | Mean                    | 1.24              | 1.23              | 1.55         | 1.47              | 0.51         | 0.73         |
|             | SEM                     | ±0.15             | ±0.14             | ±0.19        | ±0.18             | ±0.11        | ±0.15        |
| BD_T4       | Mean                    | 1.21              | 1.18              | 1.51         | 1.42              | 0.51         | 0.68         |
|             | SEM                     | ±0.16             | ±0.14             | ±0.19        | ±0.17             | ±0.13        | ±0.21        |
| BD          | <i>p</i> -value (ANOVA) | <b>&lt;0.0001</b> | <b>0.003</b>      | <b>0.002</b> | <b>&lt;0.0001</b> | <b>0.001</b> | <b>0.873</b> |
| GAS_T1      | Mean                    | 1.82              | 1.65              | 2.11         | 1.90              | 1.14         | 1.12         |
|             | SEM                     | ±0.14             | ±0.14             | ±0.17        | ±0.17             | ±0.18        | ±0.20        |
| GAS_T2      | Mean                    | 1.66              | 1.36              | 1.98         | 1.54              | 0.92         | 0.97         |
|             | SEM                     | ±0.15             | ±0.14             | ±0.18        | ±0.17             | ±0.13        | ±0.19        |
| GAS_T3      | Mean                    | 1.64              | 1.36              | 1.91         | 1.51              | 1.02         | 1.04         |
|             | SEM                     | ±0.16             | ±0.14             | ±0.20        | ±0.17             | ±0.18        | ±0.21        |
| GAS_T4      | Mean                    | 1.56              | 1.29              | 1.76         | 1.50              | 1.07         | 0.85         |
|             | SEM                     | ±0.17             | ±0.13             | ±0.21        | ±0.16             | ±0.21        | ±0.19        |
| GAS         | <i>p</i> -value (ANOVA) | <b>0.099</b>      | <b>&lt;0.0001</b> | <b>0.078</b> | <b>0.000</b>      | <b>0.485</b> | <b>0.198</b> |
| RUM_T1      | Mean                    | 1.33              | 1.34              | 1.63         | 1.63              | 0.65         | 0.73         |
|             | SEM                     | ±0.13             | ±0.13             | ±0.16        | ±0.14             | ±0.11        | ±0.16        |
| RUM_T2      | Mean                    | 1.14              | 1.10              | 1.45         | 1.31              | 0.41         | 0.65         |
|             | SEM                     | ±0.13             | ±0.12             | ±0.15        | ±0.15             | ±0.13        | ±0.11        |
| RUM_T3      | Mean                    | 1.07              | 1.08              | 1.35         | 1.26              | 0.43         | 0.70         |
|             | SEM                     | ±0.15             | ±0.11             | ±0.18        | ±0.15             | ±0.13        | ±0.11        |
| RUM_T4      | Mean                    | 0.95              | 1.04              | 1.21         | 1.29              | 0.36         | 0.51         |
|             | SEM                     | ±0.14             | ±0.12             | ±0.16        | ±0.15             | ±0.16        | ±0.12        |
| RUM         | <i>p</i> -value (ANOVA) | <b>0.002</b>      | <b>0.005</b>      | <b>0.015</b> | <b>0.011</b>      | <b>0.114</b> | <b>0.165</b> |
| FF_T1       | Mean                    | 1.54              | 1.34              | 1.88         | 1.73              | 0.76         | 0.53         |
|             | SEM                     | ±0.15             | ±0.13             | ±0.17        | ±0.13             | ±0.16        | ±0.10        |
| FF_T2       | Mean                    | 1.10              | 1.05              | 1.41         | 1.22              | 0.38         | 0.69         |
|             | SEM                     | ±0.15             | ±0.13             | ±0.18        | ±0.18             | ±0.10        | ±0.14        |
| FF_T3       | Mean                    | 1.09              | 1.04              | 1.35         | 1.21              | 0.48         | 0.67         |
|             | SEM                     | ±0.16             | ±0.13             | ±0.20        | ±0.17             | ±0.13        | ±0.15        |
| FF_T4       | Mean                    | 1.03              | 0.97              | 1.30         | 1.15              | 0.40         | 0.60         |
|             | SEM                     | ±0.16             | ±0.13             | ±0.21        | ±0.17             | ±0.13        | ±0.18        |
| FF          | <i>p</i> -value (ANOVA) | <b>&lt;0.0001</b> | <b>0.004</b>      | <b>0.002</b> | <b>0.000</b>      | <b>0.004</b> | <b>0.618</b> |
| AD_T1       | Mean                    | 0.81              | 0.73              | 1.05         | 0.91              | 0.27         | 0.34         |
|             | SEM                     | ±0.14             | ±0.11             | ±0.18        | ±0.14             | ±0.09        | ±0.08        |
| AD_T2       | Mean                    | 0.64              | 0.49              | 0.81         | 0.61              | 0.24         | 0.25         |
|             | SEM                     | ±0.12             | ±0.10             | ±0.16        | ±0.13             | ±0.06        | ±0.12        |
| AD_T3       | Mean                    | 0.59              | 0.48              | 0.77         | 0.62              | 0.16         | 0.20         |
|             | SEM                     | ±0.13             | ±0.08             | ±0.17        | ±0.11             | ±0.06        | ±0.05        |

|               |                        |                   |                   |              |                   |              |              |
|---------------|------------------------|-------------------|-------------------|--------------|-------------------|--------------|--------------|
| <b>AD_T4</b>  | <b>Mean</b>            | 0.59              | 0.48              | 0.76         | 0.64              | 0.18         | 0.15         |
|               | <b>SEM</b>             | ±0.13             | ±0.08             | ±0.17        | ±0.10             | ±0.06        | ±0.05        |
| <b>AD</b>     | <b>p-value (ANOVA)</b> | <b>0.021</b>      | <b>0.011</b>      | <b>0.032</b> | <b>0.035</b>      | <i>0.508</i> | <i>0.213</i> |
| <b>DTS_T1</b> | <b>Mean</b>            | 7.20              | 6.56              | 8.68         | 8.08              | 3.74         | 3.41         |
|               | <b>SEM</b>             | ±0.56             | ±0.46             | ±0.60        | ±0.42             | ±0.31        | ±0.32        |
| <b>DTS_T2</b> | <b>Mean</b>            | 5.84              | 5.23              | 7.24         | 6.13              | 2.56         | 3.35         |
|               | <b>SEM</b>             | ±0.59             | ±0.47             | ±0.69        | ±0.57             | ±0.28        | ±0.52        |
| <b>DTS_T3</b> | <b>Mean</b>            | 5.63              | 5.18              | 6.93         | 6.07              | 2.59         | 3.33         |
|               | <b>SEM</b>             | ±0.64             | ±0.45             | ±0.78        | ±0.57             | ±0.39        | ±0.44        |
| <b>DTS_T4</b> | <b>Mean</b>            | 5.33              | 4.96              | 6.53         | 6.00              | 2.53         | 2.79         |
|               | <b>SEM</b>             | ±0.65             | ±0.47             | ±0.80        | ±0.54             | ±0.49        | ±0.55        |
| <b>DTS</b>    | <b>p-value (ANOVA)</b> | <b>&lt;0.0001</b> | <b>&lt;0.0001</b> | <b>0.001</b> | <b>&lt;0.0001</b> | <b>0.027</b> | <i>0.381</i> |

**Legend:** The enlisted gastrointestinal (GI) symptoms are BD (bloating/distension), GAS (passage of gas), RUM (GI rumbling), FF (feeling of fullness) and AD (abdominal discomfort). A daily total score (DTS) calculated as the sum of all items recorded each day is also shown. The periods depicted are T1 (average of weeks 1 and 2 of run-in), T2 (average of weeks 1 and 2 of intervention), T3 (average of weeks 3 and 4 of intervention) and T4 (average of weeks 5 and 6 of intervention). A lower score is concomitant with lower severity of symptoms. A one-way repeated measures ANOVA was used to test for significant changes over time within each group ( $p$ -values  $\leq 0.05$  are depicted in bold text).
