# Supplementary material for: A yeast fermentate improves gastrointestinal discomfort and constipation by modulation of the gut microbiome: results from a randomized double-blind placebo-controlled pilot trial
Source: Springer Nature journal article supplement (doi:10.1186/s12906-017-1948-0), 2017-09-04
Supplement: MOESM2 [file 14976506]

Additional file 3 Mean values and standard error or the mean (SEM) calculated for the daily records of stool frequency and consistency (averages were calculated for 2-week intervals).

| GI symptoms |                               | Total cohort             |                     | Severe              |                     | Moderate            |                     |
|-------------|-------------------------------|--------------------------|---------------------|---------------------|---------------------|---------------------|---------------------|
|             |                               | EpiCor                   | Placebo             | EpiCor              | Placebo             | EpiCor              | Placebo             |
| SF_T1       | Mean                          | 0.68                     | 0.66                | 0.69                | 0.60                | 0.67                | 0.79                |
|             | SEM                           | ±0.03                    | ±0.05               | ±0.05               | ±0.06               | ±0.05               | ±0.06               |
| SF_T2       | Mean                          | 0.88                     | 0.76                | 0.87                | 0.70                | 0.90                | 0.89                |
|             | SEM                           | ±0.05                    | ±0.06               | ±0.06               | ±0.09               | ±0.11               | ±0.07               |
| SF_T3       | Mean                          | 0.89                     | 0.78                | 0.91                | 0.72                | 0.87                | 0.90                |
|             | SEM                           | ±0.05                    | ±0.05               | ±0.07               | ±0.06               | ±0.07               | ±0.07               |
| SF_T4       | Mean                          | 0.86                     | 0.79                | 0.90                | 0.72                | 0.79                | 0.92                |
|             | SEM                           | ±0.05                    | ±0.05               | ±0.07               | ±0.06               | ±0.09               | ±0.05               |
| SF          | <b><i>p-value (ANOVA)</i></b> | <b><i>&lt;0.0001</i></b> | <b><i>0.003</i></b> | <b><i>0.000</i></b> | <b><i>0.040</i></b> | <b><i>0.005</i></b> | <b><i>0.113</i></b> |
| SC_T1       | Mean                          | 2.88                     | 3.29                | 2.68                | 3.18                | 3.34                | 3.53                |
|             | SEM                           | ±0.17                    | ±0.16               | ±0.21               | ±0.20               | ±0.25               | ±0.28               |
| SC_T2       | Mean                          | 3.22                     | 3.18                | 3.08                | 3.07                | 3.52                | 3.40                |
|             | SEM                           | ±0.17                    | ±0.17               | ±0.21               | ±0.20               | ±0.26               | ±0.30               |
| SC_T3       | Mean                          | 3.03                     | 3.25                | 2.99                | 3.29                | 3.11                | 3.18                |
|             | SEM                           | ±0.17                    | ±0.16               | ±0.21               | ±0.21               | ±0.31               | ±0.21               |
| SC_T4       | Mean                          | 2.95                     | 3.29                | 2.87                | 3.31                | 3.13                | 3.25                |
|             | SEM                           | ±0.15                    | ±0.15               | ±0.18               | ±0.19               | ±0.30               | ±0.25               |
| SC          | <b><i>p-value (ANOVA)</i></b> | <b><i>0.037</i></b>      | <b><i>0.535</i></b> | <b><i>0.044</i></b> | <b><i>0.424</i></b> | <b><i>0.031</i></b> | <b><i>0.425</i></b> |

**Legend:** SC, stool consistency; SF, stool frequency. The periods depicted are T1 (average of weeks 1 and 2 of run-in), T2 (average of weeks 1 and 2 of intervention), T3 (average of weeks 3 and 4 of intervention) and T4 (average of weeks 5 and 6 of intervention). A higher score is concomitant with an increase in frequency and normalization of consistency. A one-way repeated measures ANOVA was used to test for significant changes over time within each group ( $p$ -values  $\leq 0.05$  are depicted in bold text).
