# Supplementary material for: A yeast fermentate improves gastrointestinal discomfort and constipation by modulation of the gut microbiome: results from a randomized double-blind placebo-controlled pilot trial
Source: Springer Nature journal article supplement (doi:10.1186/s12906-017-1948-0), 2017-09-04
Supplement: MOESM6 [file 14976506]

Additional file 7 Microbial taxa fold-changes (V2/V1 and V3/V1) in the total cohort.

| Taxa                         |                                  | Total cohort (n=79) |              |       |              |               |              |       |              |
|------------------------------|----------------------------------|---------------------|--------------|-------|--------------|---------------|--------------|-------|--------------|
|                              |                                  | Placebo (n=40)      |              |       |              | EpiCor (n=39) |              |       |              |
|                              |                                  | V2/V1               |              | V3/V1 |              | V2/V1         |              | V3/V1 |              |
|                              |                                  | FC                  | p-val.       | FC    | p-val.       | FC            | p-val.       | FC    | p-val.       |
| <b>Phylum Actinobacteria</b> |                                  |                     |              |       |              |               |              |       |              |
| <b>Bifidobacteriaceae</b>    | -                                | 0.88                | 0.536        | 0.97  | 0.952        | 0.95          | 0.885        | 1.02  | 0.979        |
|                              | <i>Bifidobacterium</i>           | 0.88                | 0.296        | 0.97  | 0.906        | 0.95          | 0.776        | 1.02  | 0.957        |
| <b>Coriobacteriaceae</b>     | -                                | 1.13                | 0.753        | 1.20  | 0.507        | 1.07          | 0.908        | 1.07  | 0.896        |
|                              | <i>Asaccharobacter</i>           | 1.35                | 0.990        | 2.46  | 0.842        | 1.40          | 0.928        | 1.67  | 0.815        |
|                              | <i>Collinsella</i>               | 1.35                | 0.306        | 1.34  | 0.330        | 0.80          | 0.699        | 0.65  | 0.352        |
|                              | Coriobacteriaceae_uncl.          | 0.70                | 0.771        | 0.99  | 0.999        | 1.53          | 0.456        | 1.98  | <b>0.085</b> |
|                              | <i>Eggerthella</i>               | 2.60                | 1.000        | 1.87  | 1.000        | 0.53          | 0.997        | 0.52  | 0.997        |
|                              | <i>Enterorhabdus</i>             | 1.34                | 0.985        | 0.52  | 0.972        | 0.50          | 0.949        | 0.63  | 0.972        |
|                              | <i>Slackia</i>                   | 1.09                | 0.999        | 0.55  | 0.983        | 1.23          | 0.974        | 0.32  | 0.805        |
| <b>Propionibacteriaceae</b>  | -                                | 0.05                | 0.994        | 0.01  | 1.000        | 2.65          | 0.993        | 1.48  | 0.999        |
|                              | <i>Propionibacterium</i>         | 0.05                | 0.988        | 0.01  | 1.000        | 2.65          | 0.985        | 1.48  | 0.999        |
| <b>Phylum Bacteroidetes</b>  |                                  |                     |              |       |              |               |              |       |              |
| <b>Bacteroidaceae</b>        | -                                | 0.99                | 0.973        | 1.07  | 0.463        | 1.06          | 0.480        | 1.08  | 0.293        |
|                              | <i>Bacteroides</i>               | 0.99                | 0.946        | 1.07  | 0.224        | 1.06          | 0.231        | 1.08  | <b>0.088</b> |
| <b>Bacteroidetes_uncl.</b>   | -                                | 1.29                | 0.944        | 1.07  | 0.996        | 0.99          | 1.000        | 0.76  | 0.888        |
| <b>Bacteroidales_uncl.</b>   | -                                | 1.43                | 0.968        | 0.86  | 0.997        | 1.20          | 0.997        | 1.94  | 0.936        |
| <b>Porphyromonadaceae</b>    | -                                | 0.71                | <b>0.004</b> | 0.79  | <b>0.050</b> | 1.09          | 0.666        | 0.99  | 0.998        |
|                              | <i>Barnesiella</i>               | 0.64                | 0.199        | 0.65  | 0.227        | 1.39          | 0.201        | 1.36  | 0.262        |
|                              | <i>Butyricimonas</i>             | 1.56                | 0.987        | 1.54  | 0.988        | 0.72          | 0.950        | 0.88  | 0.991        |
|                              | <i>Odoribacter</i>               | 0.72                | 0.977        | 1.16  | 0.993        | 1.30          | 0.989        | 1.26  | 0.992        |
|                              | Porphyromonadaceae_uncl.         | 0.90                | 0.852        | 0.97  | 0.983        | 1.08          | 0.907        | 0.89  | 0.846        |
|                              | <i>Parabacteroides</i>           | 0.62                | <b>0.099</b> | 0.67  | 0.170        | 0.78          | 0.718        | 0.67  | 0.491        |
| <b>Prevotellaceae</b>        | -                                | 0.80                | 0.464        | 0.98  | 0.988        | 1.33          | 0.186        | 1.11  | 0.796        |
|                              | <i>Alloprevotella</i>            | 1.07                | 0.999        | 1.44  | 0.951        | 0.74          | 0.994        | 0.81  | 0.997        |
|                              | <i>Hallella</i>                  | 1.00                | 1.000        | 0.00  | 1.000        | 0.00          | 0.937        | 0.00  | 0.937        |
|                              | <i>Paraprevotella</i>            | 0.02                | 0.723        | 0.01  | 0.718        | 1.71          | 0.729        | 0.14  | 0.633        |
|                              | <i>Prevotella</i>                | 0.82                | 0.495        | 1.04  | 0.955        | 1.48          | <b>0.075</b> | 1.43  | 0.121        |
|                              | Prevotellaceae_uncl.             | 1.16                | 0.986        | 0.99  | 1.000        | 1.02          | 0.999        | 1.12  | 0.982        |
| <b>Rikenellaceae</b>         | -                                | 1.10                | 0.721        | 0.86  | 0.563        | 0.70          | <b>0.093</b> | 0.80  | 0.320        |
|                              | <i>Alistipes</i>                 | 1.10                | 0.523        | 0.86  | 0.326        | 0.70          | <b>0.009</b> | 0.80  | 0.105        |
| <b>Phylum Firmicutes</b>     |                                  |                     |              |       |              |               |              |       |              |
| <b>Acidaminococcaceae</b>    | -                                | 1.40                | 0.177        | 1.63  | <b>0.017</b> | 0.93          | 0.911        | 1.04  | 0.977        |
|                              | <i>Acidaminococcus</i>           | 14.74               | 0.296        | 18.26 | 0.157        | 0.40          | 0.963        | 1.96  | 0.910        |
|                              | Acidaminococcaceae_uncl.         | 1.25                | 0.994        | 2.01  | 0.904        | 0.98          | 1.000        | 1.06  | 0.999        |
|                              | <i>Succinoclasticum</i>          | 1.53                | 0.688        | 1.60  | 0.622        | 1.70          | 0.755        | 0.97  | 0.999        |
|                              | <i>Phascolarctobacterium</i>     | 1.04                | 0.980        | 1.21  | 0.606        | 0.82          | 0.564        | 0.98  | 0.991        |
| <b>Clostridiales_uncl.</b>   | -                                | 0.99                | 0.997        | 0.98  | 0.990        | 1.09          | 0.776        | 1.19  | 0.342        |
| <b>Clostridiaceae</b>        | -                                | 0.79                | 0.970        | 0.63  | 0.914        | 0.93          | 0.999        | 1.23  | 0.991        |
|                              | <i>Clostridium_sensu_stricto</i> | 0.79                | 0.940        | 0.63  | 0.833        | 0.93          | 0.998        | 1.23  | 0.981        |
| <b>Enterococcaceae</b>       | -                                | 1.20                | 1.000        | 1.79  | 0.995        | 0.72          | 1.000        | 0.38  | 0.999        |
|                              | <i>Enterococcus</i>              | 1.20                | 0.999        | 1.79  | 0.990        | 0.72          | 1.000        | 0.38  | 0.998        |
| <b>Erysipelotrichaceae</b>   | -                                | 1.17                | 0.965        | 0.92  | 0.992        | 1.57          | 0.666        | 1.54  | 0.688        |
|                              | <i>Catenibacterium</i>           | 1.20                | 0.999        | 1.39  | 0.997        | 1.56          | 0.908        | 0.23  | 0.833        |
|                              | <i>Clostridium_XVIII</i>         | 2.72                | 0.900        | 1.09  | 1.000        | 2.80          | 0.702        | 3.19  | 0.595        |
|                              | <i>Coprobacillus</i>             | 1.08                | 1.000        | 1.07  | 1.000        | 0.71          | 1.000        | 0.67  | 1.000        |
|                              | Erysipelotrichaceae_uncl.        | 0.93                | 0.992        | 0.75  | 0.918        | 0.96          | 0.999        | 1.47  | 0.925        |
|                              | <i>Turicibacter</i>              | 0.71                | 1.000        | 4.19  | 0.993        | 1.68          | 0.995        | 4.19  | 0.895        |
| <b>Firmicutes_uncl.</b>      | -                                | 0.96                | 0.932        | 1.07  | 0.757        | 0.80          | <b>0.085</b> | 0.71  | <b>0.006</b> |
| <b>Lachnospiraceae</b>       | -                                | 1.08                | <b>0.000</b> | 1.02  | 0.561        | 1.00          | 1.000        | 1.04  | <b>0.057</b> |
|                              | <i>Anaerostipes</i>              | 0.86                | 0.840        | 1.02  | 0.998        | 2.31          | <b>0.006</b> | 2.25  | <b>0.010</b> |
|                              | <i>Blautia</i>                   | 1.52                | <b>0.000</b> | 1.21  | <b>0.003</b> | 0.95          | 0.484        | 0.97  | 0.704        |

|                               |                               |      |              |      |              |      |       |      |              |
|-------------------------------|-------------------------------|------|--------------|------|--------------|------|-------|------|--------------|
|                               | <i>Clostridium_XIVa_uncl.</i> | 1.08 | 0.987        | 1.00 | 1.000        | 1.03 | 0.992 | 1.05 | 0.976        |
|                               | <i>Clostridium_XIVb_uncl.</i> | 1.15 | 0.998        | 0.76 | 0.995        | 0.96 | 1.000 | 0.61 | 0.983        |
|                               | <i>Coprococcus</i>            | 0.97 | 0.970        | 0.96 | 0.942        | 0.80 | 0.168 | 0.70 | <b>0.019</b> |
|                               | <i>Dorea</i>                  | 0.96 | 0.942        | 0.83 | 0.338        | 1.13 | 0.730 | 0.79 | 0.476        |
|                               | <i>Lachnospira</i>            | 0.96 | 0.998        | 1.83 | 0.569        | 0.45 | 0.711 | 1.13 | 0.981        |
|                               | Lachnospiraceae_uncl.         | 0.88 | <b>0.038</b> | 0.92 | 0.271        | 1.01 | 0.963 | 1.13 | <b>0.039</b> |
|                               | <i>Howardella</i>             | 0.98 | 1.000        | 1.68 | 0.984        | 0.40 | 0.998 | 0.52 | 0.999        |
|                               | <i>Roseburia</i>              | 1.11 | 0.134        | 0.94 | 0.504        | 1.00 | 1.000 | 1.08 | 0.414        |
|                               | <i>Ruminococcus</i>           | 0.95 | 0.979        | 1.33 | 0.354        | 0.90 | 0.871 | 1.26 | 0.438        |
| Lactobacillaceae              | -                             | 1.30 | 0.996        | 0.17 | 0.966        | 0.77 | 1.000 | 1.42 | 0.999        |
|                               | <i>Lactobacillus</i>          | 1.30 | 0.991        | 0.17 | 0.932        | 0.77 | 0.999 | 1.42 | 0.997        |
| Peptostreptococcaceae         | -                             | 1.04 | 0.994        | 1.21 | 0.874        | 0.91 | 0.963 | 0.77 | 0.777        |
|                               | <i>Clostridium_XI</i>         | 1.04 | 0.988        | 1.21 | 0.763        | 0.91 | 0.925 | 0.77 | 0.597        |
| Ruminococcaceae               | -                             | 0.90 | <b>0.000</b> | 0.91 | <b>0.000</b> | 0.99 | 0.954 | 0.91 | <b>0.000</b> |
|                               | <i>Butyricoccus</i>           | 1.04 | 0.997        | 0.89 | 0.976        | 1.10 | 0.994 | 0.90 | 0.994        |
|                               | <i>Faecalibacterium</i>       | 0.67 | <b>0.000</b> | 0.75 | <b>0.001</b> | 0.91 | 0.224 | 0.82 | <b>0.004</b> |
|                               | <i>Flavonifractor</i>         | 1.41 | 0.950        | 1.28 | 0.978        | 1.07 | 0.999 | 0.90 | 0.996        |
|                               | <i>Gemmiger</i>               | 0.96 | 0.977        | 0.75 | 0.458        | 0.89 | 0.885 | 1.09 | 0.916        |
|                               | <i>Clostridium_IV_uncl.</i>   | 0.49 | 0.861        | 0.89 | 0.993        | 0.68 | 0.983 | 0.45 | 0.953        |
|                               | <i>Oscillibacter</i>          | 0.61 | 0.878        | 1.28 | 0.935        | 2.12 | 0.467 | 2.16 | 0.443        |
|                               | Ruminococcaceae_uncl.         | 0.96 | 0.263        | 0.96 | 0.241        | 0.97 | 0.616 | 0.91 | <b>0.009</b> |
|                               | <i>Ruminococcus</i>           | 1.08 | 0.758        | 1.02 | 0.977        | 1.10 | 0.725 | 0.90 | 0.763        |
| Streptococcaceae              | -                             | 0.78 | 0.958        | 0.94 | 0.997        | 0.74 | 0.923 | 0.91 | 0.990        |
|                               | <i>Lactococcus</i>            | 0.82 | 0.998        | 1.15 | 0.999        | 0.59 | 0.999 | 1.29 | 0.999        |
|                               | <i>Streptococcus</i>          | 0.77 | 0.937        | 0.89 | 0.986        | 0.75 | 0.869 | 0.89 | 0.972        |
| Veillonellaceae               | -                             | 1.76 | <b>0.026</b> | 1.41 | 0.303        | 0.89 | 0.860 | 1.24 | 0.537        |
|                               | <i>Dialister</i>              | 1.92 | <b>0.001</b> | 1.42 | 0.172        | 0.93 | 0.926 | 1.33 | 0.211        |
|                               | <i>Megasphaera</i>            | 2.42 | 0.998        | 3.15 | 0.995        | 2.40 | 0.999 | 0.81 | 1.000        |
|                               | <i>Megasphaera</i>            | 0.85 | 0.997        | 1.22 | 0.993        | 0.59 | 0.918 | 0.76 | 0.970        |
|                               | <i>Mitsuokella</i>            | 0.65 | 0.999        | 0.80 | 1.000        | 1.13 | 1.000 | 1.78 | 0.998        |
|                               | <i>Veillonella</i>            | 0.82 | 0.999        | 1.68 | 0.992        | 0.53 | 0.999 | 0.78 | 1.000        |
| <b>Phylum Proteobacteria</b>  |                               |      |              |      |              |      |       |      |              |
| Alphaproteobacteria_uncl.     | -                             | 1.00 | 1.000        | 1.00 | 1.000        | 0.63 | 0.991 | 1.41 | 0.989        |
| Desulfovibrionaceae           | -                             | 1.30 | 0.987        | 1.66 | 0.939        | 0.73 | 0.990 | 1.02 | 1.000        |
|                               | <i>Desulfovibrio</i>          | 1.32 | 0.980        | 1.67 | 0.916        | 0.69 | 0.999 | 1.13 | 1.000        |
|                               | Desulfovibrionaceae_uncl.     | 1.24 | 0.999        | 1.61 | 0.996        | 0.74 | 0.988 | 0.99 | 1.000        |
| Enterobacteriaceae            | -                             | 0.69 | 0.953        | 1.17 | 0.985        | 0.58 | 0.676 | 0.90 | 0.976        |
|                               | <i>Escherichia/Shigella</i>   | 0.67 | 0.925        | 1.27 | 0.950        | 0.59 | 0.715 | 1.01 | 1.000        |
|                               | <i>Klebsiella</i>             | 0.81 | 0.999        | 0.72 | 0.997        | 0.56 | 0.895 | 0.70 | 0.947        |
| Sutterellaceae                | -                             | 0.84 | 1.000        | 1.05 | 1.000        | 3.41 | 0.665 | 0.88 | 0.999        |
|                               | <i>Parasutterella</i>         | 1.09 | 1.000        | 0.65 | 1.000        | 1.04 | 1.000 | 0.59 | 0.997        |
|                               | <i>Sutterella</i>             | 0.77 | 0.999        | 1.12 | 1.000        | 4.60 | 0.440 | 1.03 | 1.000        |
| Oxalobacteraceae              | -                             | 1.00 | 1.000        | 1.00 | 1.000        | 1.28 | 0.999 | 1.32 | 0.999        |
|                               | Oxalobacteraceae_uncl.        | 1.00 | 1.000        | 1.00 | 1.000        | 1.28 | 0.998 | 1.32 | 0.998        |
| Pasteurellaceae               | -                             | 0.70 | 1.000        | 0.22 | 1.000        | 1.79 | 0.998 | 1.22 | 1.000        |
|                               | <i>Haemophilus</i>            | 0.70 | 1.000        | 0.22 | 1.000        | 1.79 | 0.996 | 1.22 | 1.000        |
| <b>Phylum Spirochaetae</b>    |                               |      |              |      |              |      |       |      |              |
| Brachyspiraceae               | -                             | 1.02 | 1.000        | 1.08 | 1.000        | 0.95 | 1.000 | 0.76 | 0.998        |
|                               | <i>Brachyspira</i>            | 1.02 | 1.000        | 1.08 | 0.999        | 0.95 | 1.000 | 0.76 | 0.996        |
| Spirochaetaceae               | -                             | 1.98 | 1.000        | 1.67 | 1.000        | 0.99 | 1.000 | 0.36 | 0.999        |
|                               | <i>Treponema</i>              | 1.98 | 0.999        | 1.67 | 1.000        | 0.99 | 1.000 | 0.36 | 0.999        |
| <b>Phylum Verrucomicrobia</b> |                               |      |              |      |              |      |       |      |              |
| Verrucomicrobiaceae           | <i>Akkermansia</i>            | 1.11 | 0.855        | 1.07 | 0.931        | 1.35 | 0.425 | 1.20 | 0.737        |

**Legend:** A two-way repeated measures ANOVA with Dunnett's multiple comparison's test against V1 was performed to test for significant changes over time within each group ( $p$ -values  $\leq 0.05$  and  $< 0.1$  are depicted in bold text). FC, fold-change; V, visit.
