# Supplementary material for: A yeast fermentate improves gastrointestinal discomfort and constipation by modulation of the gut microbiome: results from a randomized double-blind placebo-controlled pilot trial
Source: Springer Nature journal article supplement (doi:10.1186/s12906-017-1948-0), 2017-09-04
Supplement: MOESM8 [file 14976506]

Additional file 9 Microbial taxa fold-changes (V2/V1 and V3/V1) in the moderate subgroup.

| Taxa                         |                                  | Moderate subgroup (n=25) |              |       |              |               |              |       |              |
|------------------------------|----------------------------------|--------------------------|--------------|-------|--------------|---------------|--------------|-------|--------------|
|                              |                                  | Placebo (n=13)           |              |       |              | EpiCor (n=12) |              |       |              |
|                              |                                  | V2/V1                    |              | V3/V1 |              | V2/V1         |              | V3/V1 |              |
|                              |                                  | FC                       | p-val.       | FC    | p-val.       | FC            | p-val.       | FC    | p-val.       |
| <b>Phylum Actinobacteria</b> |                                  |                          |              |       |              |               |              |       |              |
| <b>Bifidobacteriaceae</b>    | -                                | 1.13                     | 0.672        | 0.84  | 0.561        | 0.71          | 0.213        | 0.90  | 0.825        |
|                              | <i>Bifidobacterium</i>           | 1.13                     | 0.443        | 0.84  | 0.310        | 0.71          | <b>0.053</b> | 0.90  | 0.683        |
| <b>Coriobacteriaceae</b>     | -                                | 1.60                     | 0.743        | 2.11  | 0.377        | 0.82          | 0.583        | 1.26  | 0.326        |
|                              | <i>Asaccharobacter</i>           | 0.45                     | 1.000        | 17.36 | 0.748        | 1.42          | 0.937        | 2.22  | 0.585        |
|                              | <i>Collinsella</i>               | 1.90                     | 0.752        | 1.67  | 0.855        | 0.74          | 0.734        | 0.61  | 0.503        |
|                              | Coriobacteriaceae_uncl.          | 1.30                     | 0.986        | 2.71  | 0.642        | 0.99          | 1.000        | 2.95  | <b>0.001</b> |
|                              | <i>Eggerthella</i>               | 1.00                     | 1.000        | 1.00  | 1.000        | 0.53          | 0.983        | 0.52  | 0.983        |
|                              | <i>Enterorhabdus</i>             | 1.36                     | 0.992        | 0.35  | 0.973        | 0.43          | 0.994        | 0.66  | 0.998        |
|                              | <i>Slackia</i>                   | 2.08                     | 0.995        | 1.69  | 0.998        | 0.62          | 0.799        | 0.17  | 0.370        |
| <b>Propionibacteriaceae</b>  | -                                | 1.00                     | 1.000        | 1.00  | 1.000        | 9.67          | 0.994        | 0.33  | 1.000        |
|                              | <i>Propionibacterium</i>         | 1.00                     | 1.000        | 1.00  | 1.000        | 9.67          | 0.988        | 0.33  | 1.000        |
| <b>Phylum Bacteroidetes</b>  |                                  |                          |              |       |              |               |              |       |              |
| <b>Bacteroidaceae</b>        | -                                | 1.50                     | <b>0.011</b> | 1.73  | <b>0.000</b> | 0.88          | 0.218        | 0.97  | 0.886        |
|                              | <i>Bacteroides</i>               | 1.50                     | <b>0.000</b> | 1.73  | <b>0.000</b> | 0.88          | <b>0.055</b> | 0.97  | 0.785        |
| <b>Bacteroidetes_uncl.</b>   | -                                | 1.25                     | 0.991        | 1.69  | 0.936        | 1.04          | 0.997        | 0.56  | 0.694        |
| <b>Bacteroidales_uncl.</b>   | -                                | 2.51                     | 0.966        | 1.80  | 0.990        | 1.19          | 1.000        | 2.01  | 0.991        |
| <b>Porphyromonadaceae</b>    | -                                | 0.54                     | <b>0.000</b> | 0.53  | <b>0.000</b> | 0.93          | 0.928        | 1.13  | 0.790        |
|                              | <i>Barnesiella</i>               | 0.48                     | <b>0.051</b> | 0.51  | <b>0.065</b> | 1.45          | 0.840        | 1.71  | 0.652        |
|                              | <i>Butyricimonas</i>             | 0.93                     | 1.000        | 1.34  | 0.999        | 0.58          | 0.915        | 1.07  | 0.998        |
|                              | <i>Odoribacter</i>               | 0.96                     | 1.000        | 0.78  | 0.998        | 0.80          | 0.997        | 0.51  | 0.979        |
|                              | Porphyromonadaceae_uncl.         | 0.85                     | 0.803        | 0.74  | 0.499        | 1.13          | 0.951        | 1.06  | 0.988        |
|                              | <i>Parabacteroides</i>           | 0.29                     | <b>0.004</b> | 0.34  | <b>0.008</b> | 0.60          | 0.654        | 1.02  | 0.999        |
| <b>Prevotellaceae</b>        | -                                | 0.86                     | 0.834        | 0.88  | 0.884        | 1.01          | 0.999        | 1.43  | 0.326        |
|                              | <i>Alloprevotella</i>            | 0.73                     | 0.989        | 0.55  | 0.970        | 1.12          | 1.000        | 1.06  | 1.000        |
|                              | <i>Hallella</i>                  | 1.00                     | 1.000        | 1.00  | 1.000        | 1.00          | 1.000        | 1.00  | 1.000        |
|                              | <i>Paraprevotella</i>            | 0.40                     | 1.000        | 0.20  | 1.000        | 0.50          | 1.000        | 1.50  | 1.000        |
|                              | <i>Prevotella</i>                | 0.86                     | 0.802        | 0.94  | 0.961        | 0.96          | 0.990        | 1.63  | 0.128        |
|                              | Prevotellaceae_uncl.             | 0.93                     | 0.998        | 0.79  | 0.981        | 1.13          | 0.977        | 1.03  | 0.999        |
| <b>Rikenellaceae</b>         | -                                | 0.91                     | 0.972        | 1.37  | 0.598        | 1.11          | 0.869        | 1.22  | 0.554        |
|                              | <i>Alistipes</i>                 | 0.91                     | 0.942        | 1.37  | 0.351        | 1.11          | 0.756        | 1.22  | 0.318        |
| <b>Phylum Firmicutes</b>     |                                  |                          |              |       |              |               |              |       |              |
| <b>Acidaminococcaceae</b>    | -                                | 1.06                     | 0.989        | 1.46  | 0.600        | 0.72          | 0.336        | 0.99  | 0.998        |
|                              | <i>Acidaminococcus</i>           | 0.00                     | 1.000        | 0.00  | 1.000        | 0.40          | 0.812        | 1.96  | 0.598        |
|                              | Acidaminococcaceae_uncl.         | 1.45                     | 0.993        | 2.34  | 0.941        | 0.40          | 0.886        | 0.66  | 0.960        |
|                              | <i>Succinoclasticum</i>          | 1.16                     | 0.996        | 2.18  | 0.801        | 0.84          | 0.969        | 1.01  | 1.000        |
|                              | <i>Phascolarctobacterium</i>     | 1.00                     | 1.000        | 1.20  | 0.889        | 0.81          | 0.729        | 0.80  | 0.701        |
| <b>Clostridiales_uncl.</b>   | -                                | 1.26                     | 0.393        | 0.89  | 0.837        | 0.89          | 0.861        | 1.20  | 0.617        |
| <b>Clostridiaceae</b>        | -                                | 0.99                     | 1.000        | 0.45  | 0.988        | 0.96          | 1.000        | 3.76  | 0.870        |
|                              | <i>Clostridium_sensu_stricto</i> | 0.99                     | 1.000        | 0.45  | 0.975        | 0.96          | 1.000        | 3.76  | 0.758        |
| <b>Enterococcaceae</b>       | -                                | 2.11                     | 0.999        | 4.38  | 0.993        | 0.64          | 0.999        | 0.17  | 0.997        |
|                              | <i>Enterococcus</i>              | 2.11                     | 0.998        | 4.38  | 0.984        | 0.64          | 0.999        | 0.17  | 0.994        |
| <b>Erysipelotrichaceae</b>   | -                                | 0.88                     | 0.988        | 0.68  | 0.921        | 1.54          | 0.513        | 1.09  | 0.981        |
|                              | <i>Catenibacterium</i>           | 4.25                     | 1.000        | 16.00 | 0.996        | 1.68          | 0.525        | 0.22  | 0.438        |
|                              | <i>Clostridium_XVIII</i>         | 1.91                     | 0.964        | 0.67  | 0.995        | 1.15          | 1.000        | 4.30  | 0.799        |
|                              | <i>Coprobacillus</i>             | 0.72                     | 1.000        | 0.48  | 0.999        | 1.48          | 1.000        | 0.48  | 1.000        |
|                              | Erysipelotrichaceae_uncl.        | 0.66                     | 0.892        | 0.47  | 0.760        | 1.19          | 0.984        | 2.02  | 0.627        |
|                              | <i>Turicibacter</i>              | 0.66                     | 1.000        | 4.68  | 0.977        | 2.37          | 0.961        | 0.89  | 1.000        |
| <b>Firmicutes_uncl.</b>      | -                                | 0.78                     | 0.506        | 0.86  | 0.755        | 0.76          | 0.239        | 1.04  | 0.954        |
| <b>Lachnospiraceae</b>       | -                                | 1.06                     | <b>0.096</b> | 1.09  | <b>0.009</b> | 0.93          | <b>0.006</b> | 0.94  | <b>0.011</b> |
|                              | <i>Anaerostipes</i>              | 0.72                     | 0.928        | 2.78  | <b>0.080</b> | 0.67          | 0.886        | 0.83  | 0.969        |
|                              | <i>Blautia</i>                   | 1.01                     | 0.981        | 0.98  | 0.959        | 0.84          | <b>0.023</b> | 0.77  | <b>0.001</b> |

|                               |                               |      |              |      |              |      |              |      |              |
|-------------------------------|-------------------------------|------|--------------|------|--------------|------|--------------|------|--------------|
|                               | <i>Clostridium_XIVa_uncl.</i> | 1.40 | 0.889        | 0.84 | 0.981        | 0.92 | 0.948        | 1.14 | 0.853        |
|                               | <i>Clostridium_XIVb_uncl.</i> | 1.60 | 0.993        | 0.58 | 0.997        | 0.60 | 0.995        | 0.56 | 0.994        |
|                               | <i>Coprococcus</i>            | 1.36 | 0.442        | 1.60 | 0.124        | 0.86 | 0.591        | 0.67 | <b>0.076</b> |
|                               | <i>Dorea</i>                  | 0.85 | 0.668        | 0.64 | 0.106        | 1.29 | 0.549        | 0.89 | 0.917        |
|                               | <i>Lachnospira</i>            | 1.20 | 0.964        | 1.49 | 0.808        | 1.05 | 0.999        | 1.22 | 0.985        |
|                               | Lachnospiraceae_uncl.         | 0.82 | <b>0.060</b> | 0.99 | 0.983        | 1.26 | <b>0.000</b> | 1.22 | <b>0.001</b> |
|                               | <i>Howardella</i>             | 0.91 | 1.000        | 1.34 | 0.997        | 1.00 | 1.000        | 1.00 | 1.000        |
|                               | <i>Roseburia</i>              | 1.56 | <b>0.000</b> | 1.36 | <b>0.004</b> | 0.70 | <b>0.002</b> | 0.80 | <b>0.053</b> |
|                               | <i>Ruminococcus</i>           | 0.80 | 0.688        | 0.78 | 0.624        | 0.47 | <b>0.047</b> | 1.06 | 0.956        |
| Lactobacillaceae              | -                             | 0.00 | 1.000        | 0.00 | 1.000        | 0.75 | 0.998        | 1.54 | 0.993        |
|                               | <i>Lactobacillus</i>          | 0.00 | 1.000        | 0.00 | 1.000        | 0.75 | 0.997        | 1.54 | 0.986        |
| Peptostreptococcaceae         | -                             | 1.20 | 0.987        | 1.13 | 0.994        | 1.50 | 0.452        | 0.73 | 0.789        |
|                               | <i>Clostridium_XI</i>         | 1.20 | 0.972        | 1.13 | 0.988        | 1.50 | 0.217        | 0.73 | 0.625        |
| Ruminococcaceae               | -                             | 0.92 | <b>0.048</b> | 0.89 | <b>0.007</b> | 1.15 | <b>0.000</b> | 0.95 | 0.256        |
|                               | <i>Butyricoccus</i>           | 2.42 | 0.578        | 1.71 | 0.869        | 1.02 | 1.000        | 1.31 | 0.983        |
|                               | <i>Faecalibacterium</i>       | 0.72 | <b>0.026</b> | 0.83 | 0.225        | 1.09 | 0.724        | 1.00 | 1.000        |
|                               | <i>Flavonifractor</i>         | 1.02 | 1.000        | 1.02 | 1.000        | 0.73 | 0.968        | 0.49 | 0.889        |
|                               | <i>Gemmiger</i>               | 1.33 | 0.731        | 0.96 | 0.994        | 1.28 | 0.676        | 1.43 | 0.414        |
|                               | <i>Clostridium_IV_uncl.</i>   | 0.95 | 1.000        | 0.90 | 0.999        | 1.54 | 0.981        | 0.70 | 0.994        |
|                               | <i>Oscillibacter</i>          | 0.95 | 1.000        | 3.03 | 0.667        | 2.41 | 0.246        | 1.74 | 0.656        |
|                               | Ruminococcaceae_uncl.         | 0.92 | 0.181        | 0.80 | <b>0.000</b> | 1.06 | 0.204        | 0.88 | <b>0.002</b> |
|                               | <i>Ruminococcus</i>           | 0.98 | 0.992        | 1.17 | 0.663        | 0.96 | 0.981        | 0.94 | 0.971        |
| Streptococcaceae              | -                             | 0.57 | 0.887        | 0.77 | 0.964        | 0.82 | 0.976        | 0.78 | 0.963        |
|                               | <i>Lactococcus</i>            | 1.53 | 1.000        | 2.11 | 1.000        | 0.77 | 1.000        | 1.35 | 0.999        |
|                               | <i>Streptococcus</i>          | 0.56 | 0.770        | 0.74 | 0.914        | 0.83 | 0.960        | 0.74 | 0.910        |
| Veillonellaceae               | -                             | 1.46 | 0.855        | 1.10 | 0.993        | 0.59 | 0.678        | 0.80 | 0.906        |
|                               | <i>Dialister</i>              | 1.60 | 0.724        | 1.03 | 0.999        | 0.55 | 0.661        | 0.75 | 0.879        |
|                               | <i>Megamonas</i>              | 0.19 | 1.000        | 5.94 | 0.994        | 1.00 | 1.000        | 1.00 | 1.000        |
|                               | <i>Megasphaera</i>            | 1.32 | 0.998        | 1.31 | 0.998        | 0.71 | 0.971        | 0.73 | 0.975        |
|                               | <i>Mitsuokella</i>            | 1.02 | 1.000        | 0.46 | 0.999        | 0.43 | 0.999        | 2.63 | 0.994        |
|                               | <i>Veillonella</i>            | 0.76 | 0.999        | 1.13 | 1.000        | 0.63 | 0.998        | 0.90 | 1.000        |
| <b>Phylum Proteobacteria</b>  |                               |      |              |      |              |      |              |      |              |
| Alphaproteobacteria_uncl.     | -                             | 1.00 | 1.000        | 1.00 | 1.000        | 0.45 | 0.990        | 0.20 | 0.978        |
| Desulfovibrionaceae           | -                             | 1.16 | 0.993        | 1.02 | 1.000        | 0.45 | 0.991        | 1.06 | 1.000        |
|                               | <i>Desulfovibrio</i>          | 1.13 | 0.991        | 0.94 | 0.998        | 0.48 | 0.991        | 0.81 | 0.999        |
|                               | Desulfovibrionaceae_uncl.     | 1.46 | 0.999        | 1.97 | 0.996        | 0.38 | 0.998        | 1.65 | 0.998        |
| Enterobacteriaceae            | -                             | 1.13 | 0.997        | 1.05 | 1.000        | 0.37 | 0.694        | 1.24 | 0.948        |
|                               | <i>Escherichia/Shigella</i>   | 1.10 | 0.998        | 1.13 | 0.996        | 0.31 | 0.920        | 2.28 | 0.758        |
|                               | <i>Klebsiella</i>             | 1.30 | 0.999        | 0.57 | 0.999        | 0.40 | 0.716        | 0.79 | 0.959        |
| Sutterellaceae                | -                             | 0.68 | 1.000        | 0.41 | 0.999        | 6.46 | 0.149        | 0.79 | 0.997        |
|                               | <i>Parasutterella</i>         | 0.00 | 1.000        | 0.00 | 1.000        | 0.56 | 1.000        | 0.36 | 0.999        |
|                               | <i>Sutterella</i>             | 0.67 | 0.999        | 0.41 | 0.997        | 7.06 | <b>0.025</b> | 0.84 | 0.997        |
| Oxalobacteraceae              | -                             | 1.00 | 1.000        | 1.00 | 1.000        | 2.51 | 0.965        | 2.58 | 0.961        |
|                               | Oxalobacteraceae_uncl.        | 1.00 | 1.000        | 1.00 | 1.000        | 2.51 | 0.930        | 2.58 | 0.924        |
| Pasteurellaceae               | -                             | 0.00 | 1.000        | 0.00 | 1.000        | 0.00 | 1.000        | 0.00 | 1.000        |
|                               | <i>Haemophilus</i>            | 0.00 | 1.000        | 0.00 | 1.000        | 0.00 | 1.000        | 0.00 | 1.000        |
| <b>Phylum Spirochaetae</b>    |                               |      |              |      |              |      |              |      |              |
| Brachyspiraceae               | -                             | 1.04 | 1.000        | 0.75 | 0.997        | 0.86 | 0.999        | 0.76 | 0.998        |
|                               | <i>Brachyspira</i>            | 1.04 | 1.000        | 0.75 | 0.995        | 0.86 | 0.999        | 0.76 | 0.996        |
| Spirochaetaceae               | -                             | 2.50 | 1.000        | 2.33 | 1.000        | 0.66 | 1.000        | 0.18 | 0.997        |
|                               | <i>Treponema</i>              | 2.50 | 1.000        | 2.33 | 1.000        | 0.66 | 0.999        | 0.18 | 0.994        |
| <b>Phylum Verrucomicrobia</b> |                               |      |              |      |              |      |              |      |              |
| Verrucomicrobiaceae           | <i>Akkermansia</i>            | 0.93 | 0.973        | 0.82 | 0.821        | 2.42 | <b>0.000</b> | 1.88 | <b>0.036</b> |

**Legend:** A two-way repeated measures ANOVA with Dunnett's multiple comparison's test against V1 was performed to test for significant changes over time within each group ( $p$ -values  $\leq 0.05$  and  $< 0.1$  are depicted in bold text). FC, fold-change; V, visit.
